# Supplementary material
Source: ML conference proceedings conference paper supplement (https://www.ecva.net/papers/eccv_2020/papers_ECCV/html/123700545_ECCV_2020_paper.php)
Supplement: Supplementary file 1 [file 123700545-supp.zip]

Chair

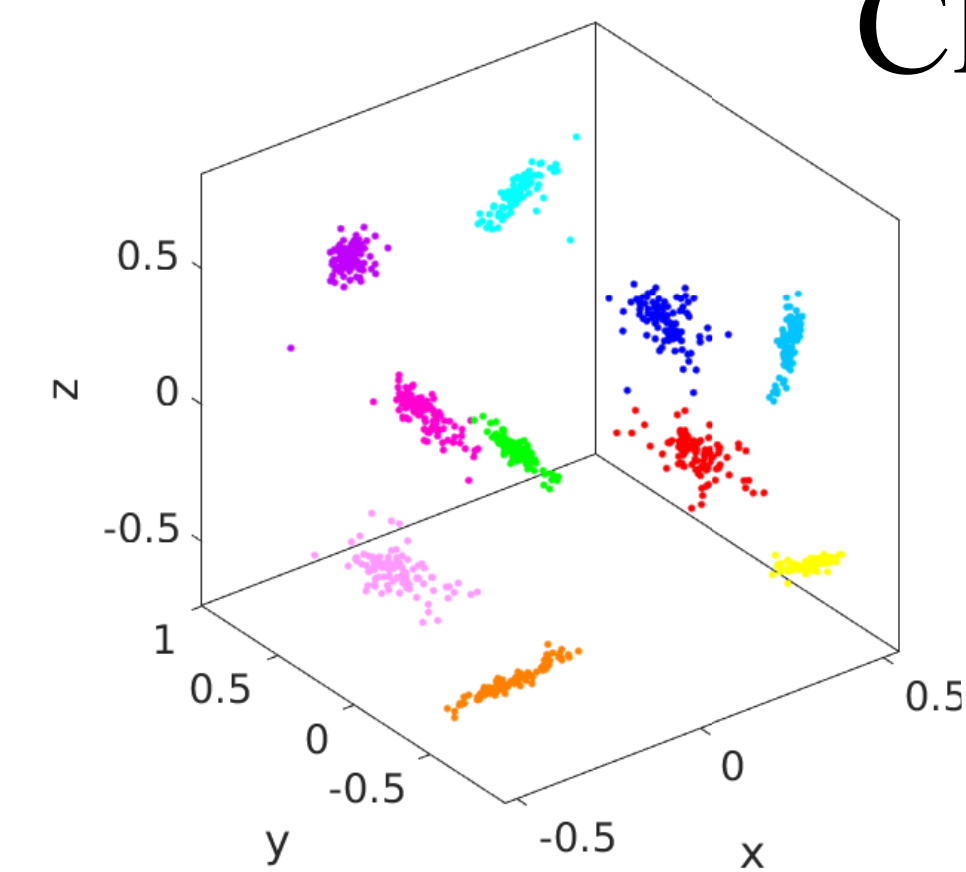

Ours

Table

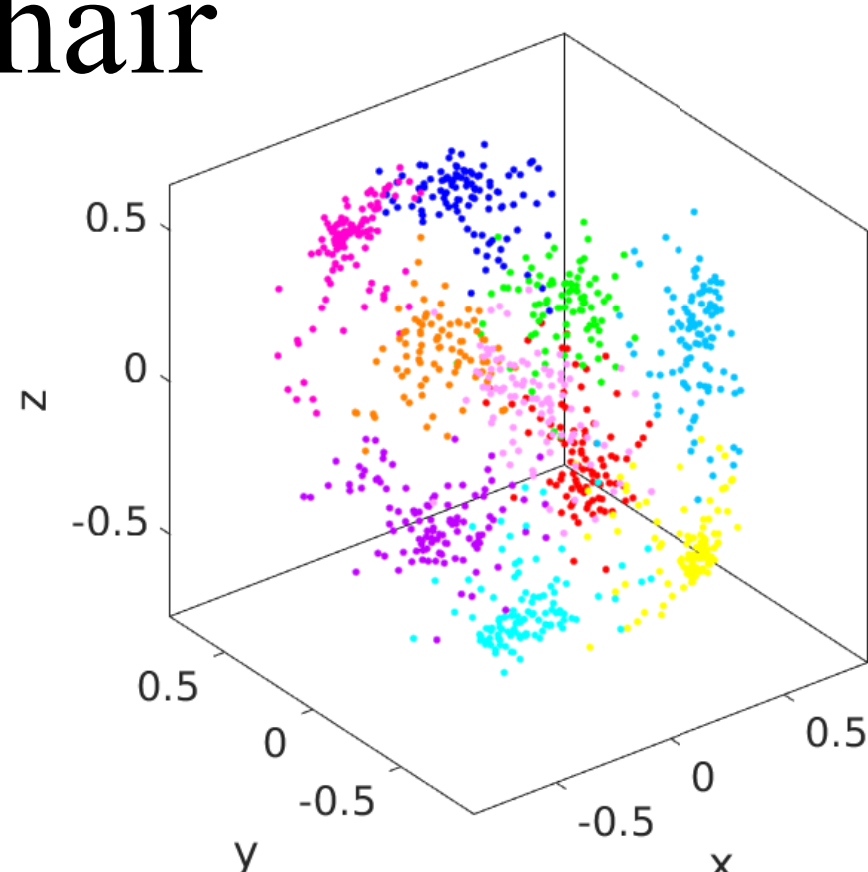

USIP

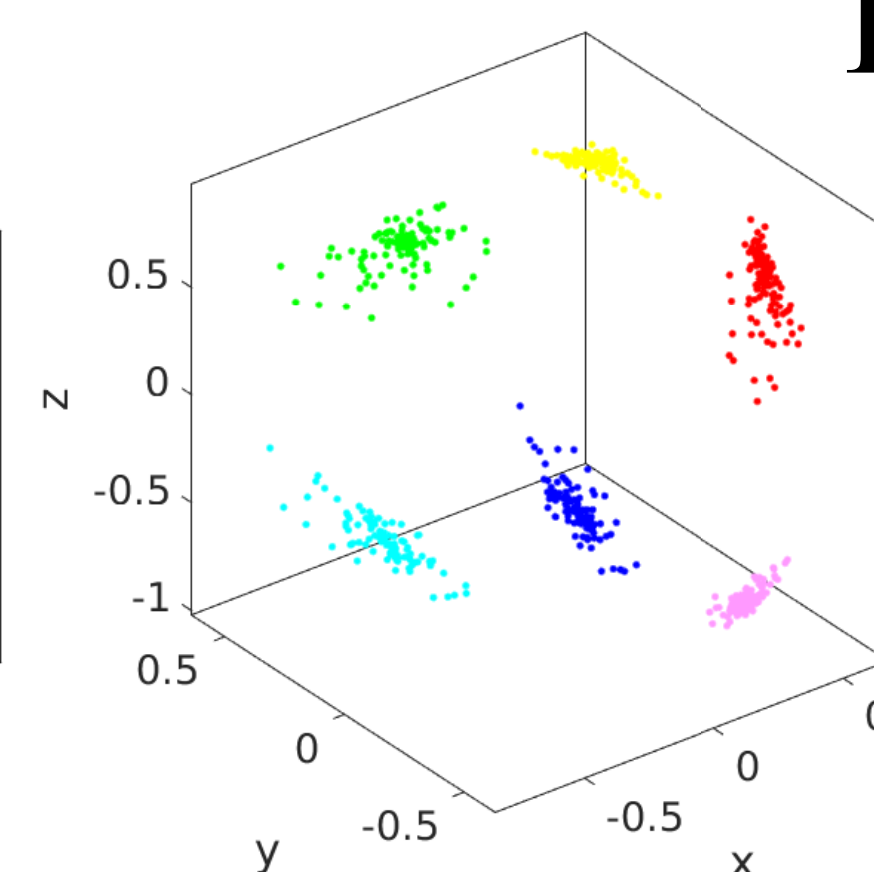

Ours

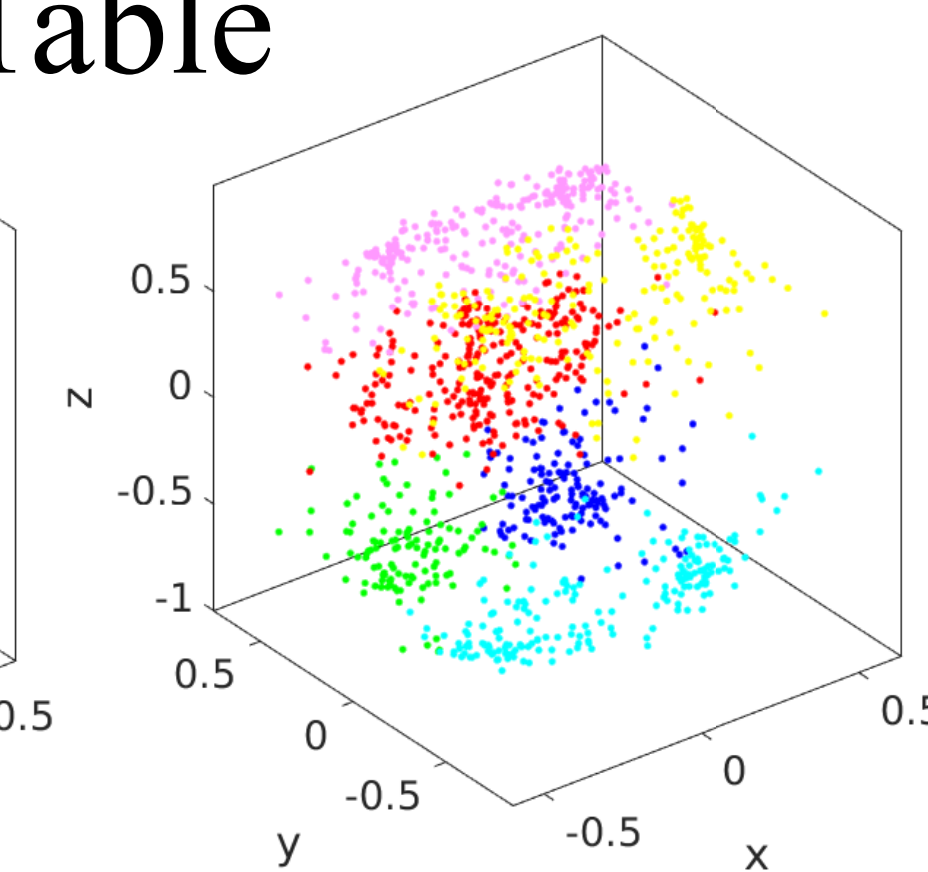

USIP

Bed

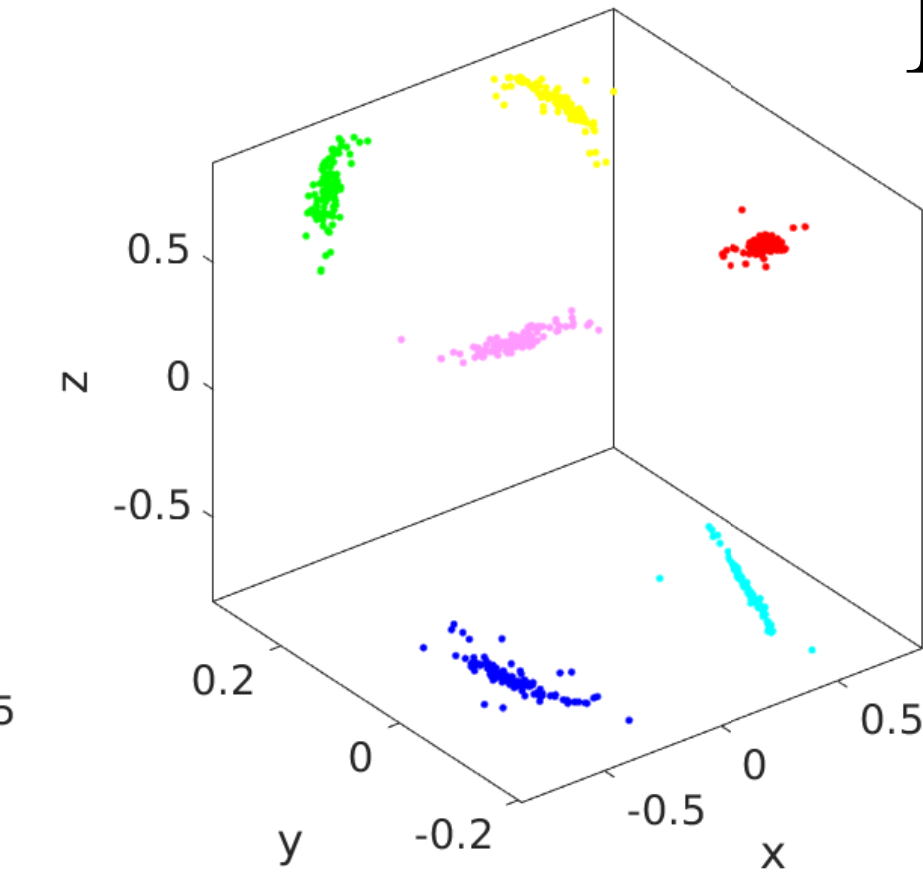

Ours

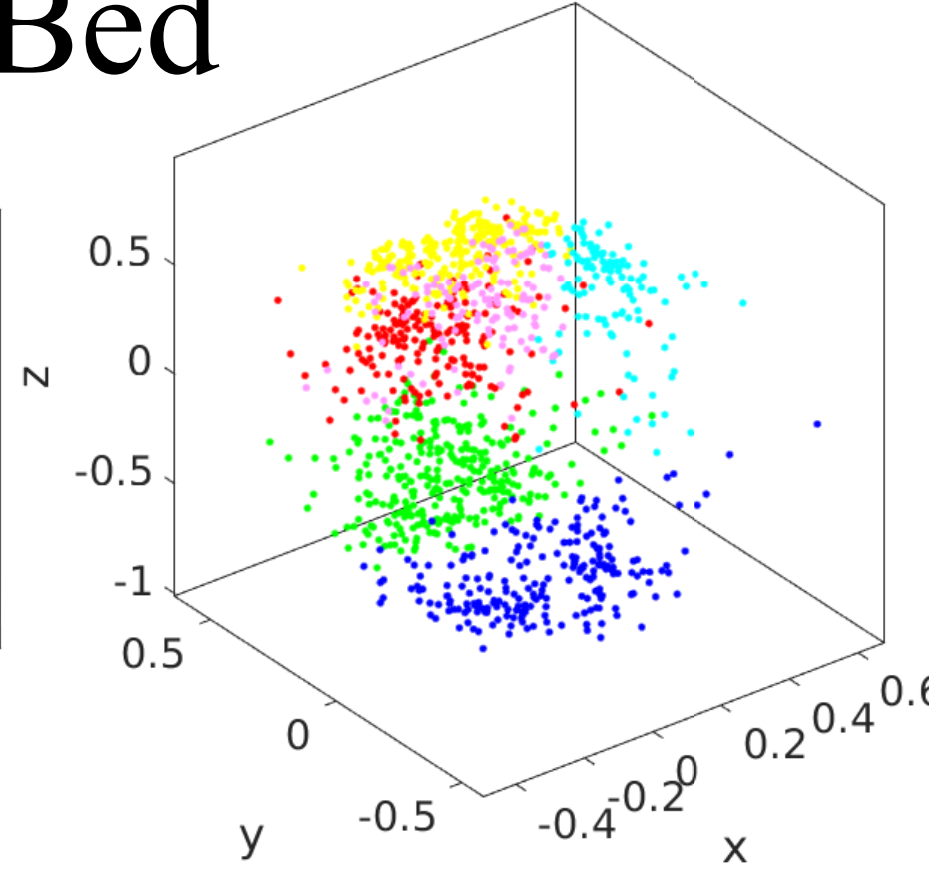

USIP

Airplane

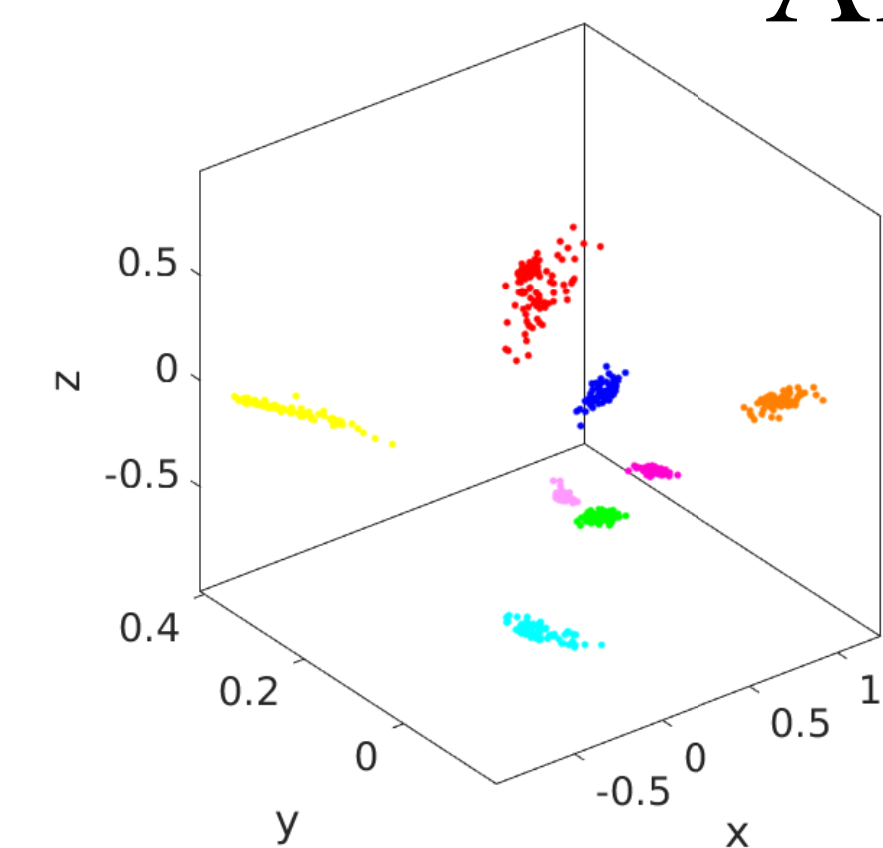

Ours

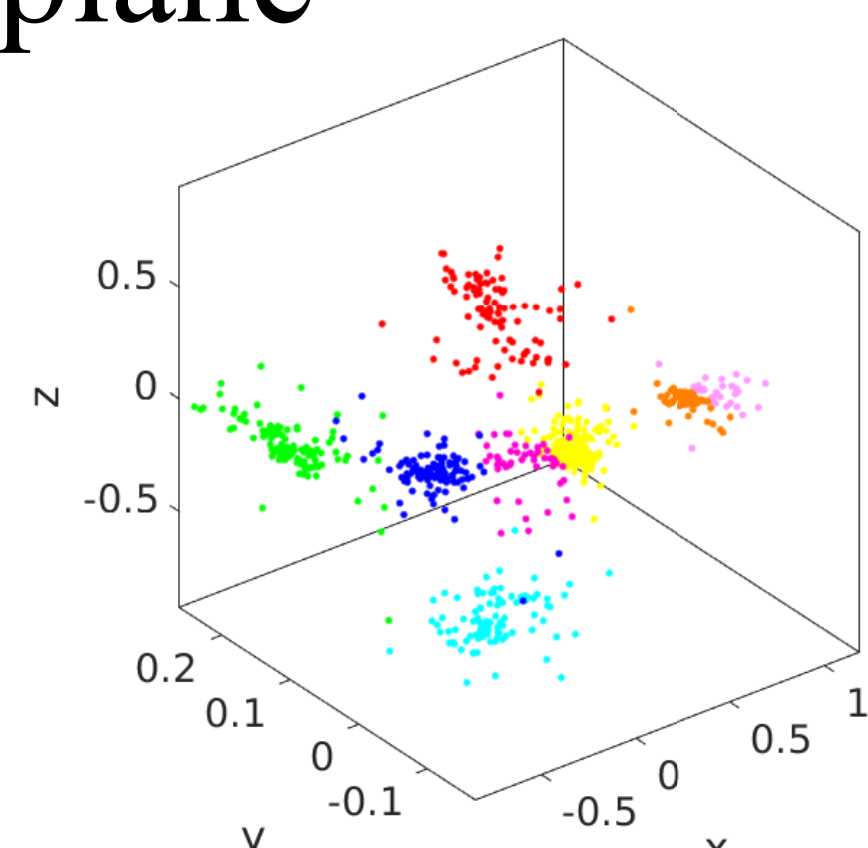

USIP

Car

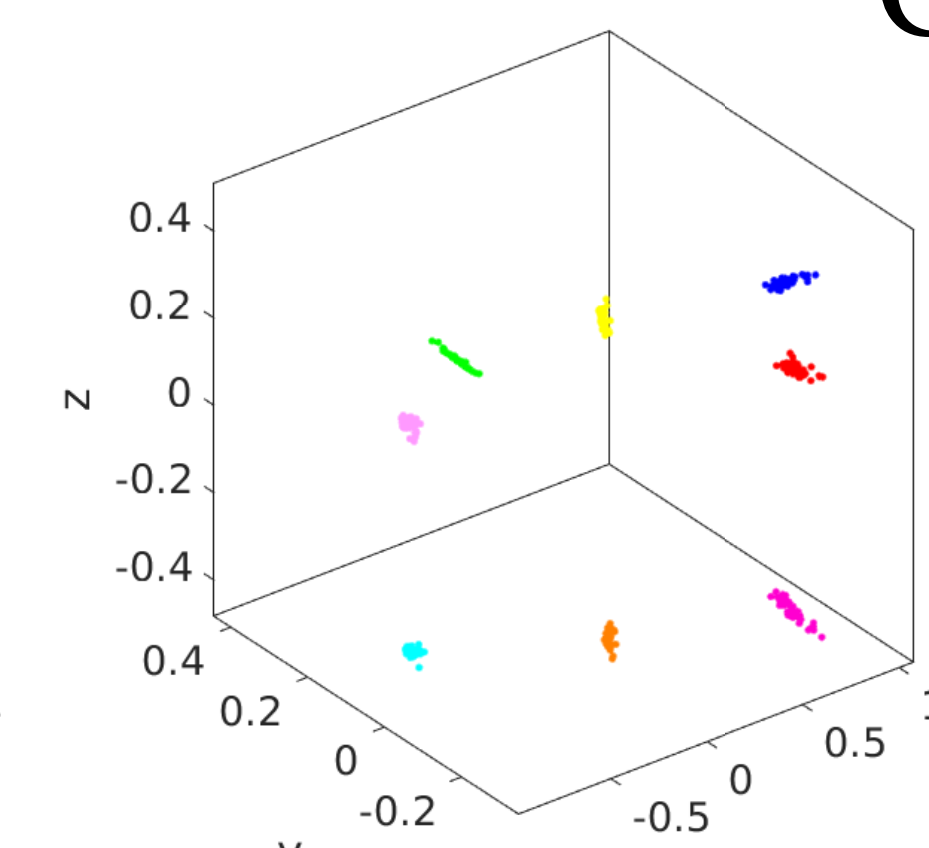

Ours

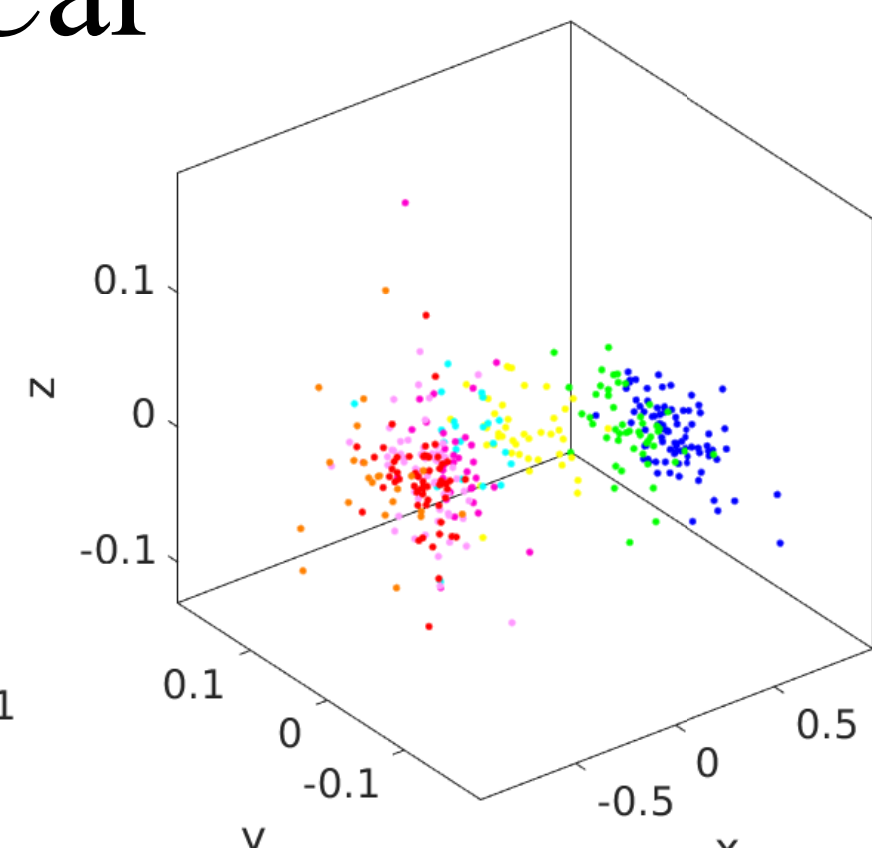

USIP

Motorbike

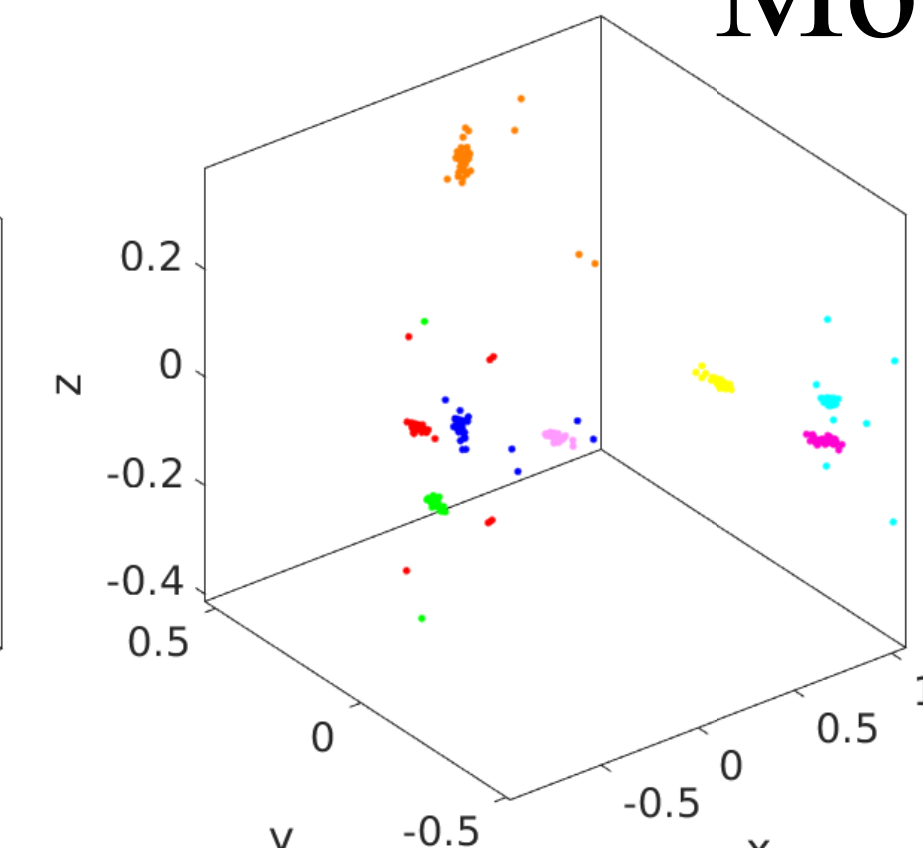

Ours

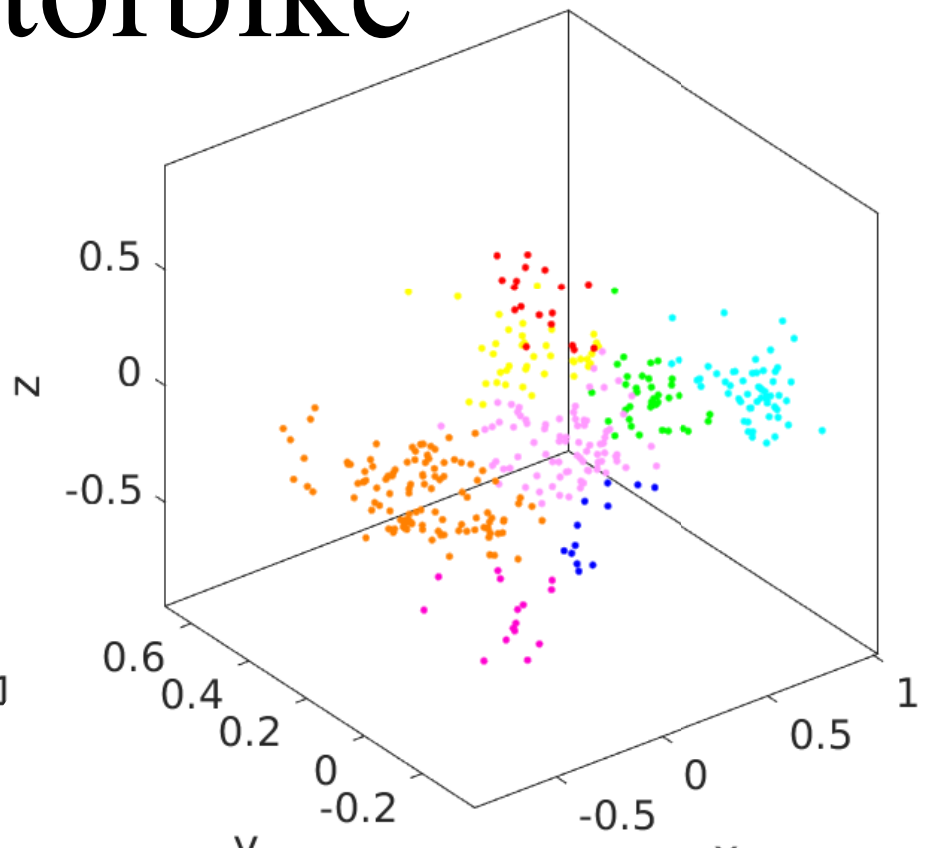

USIP

Human body

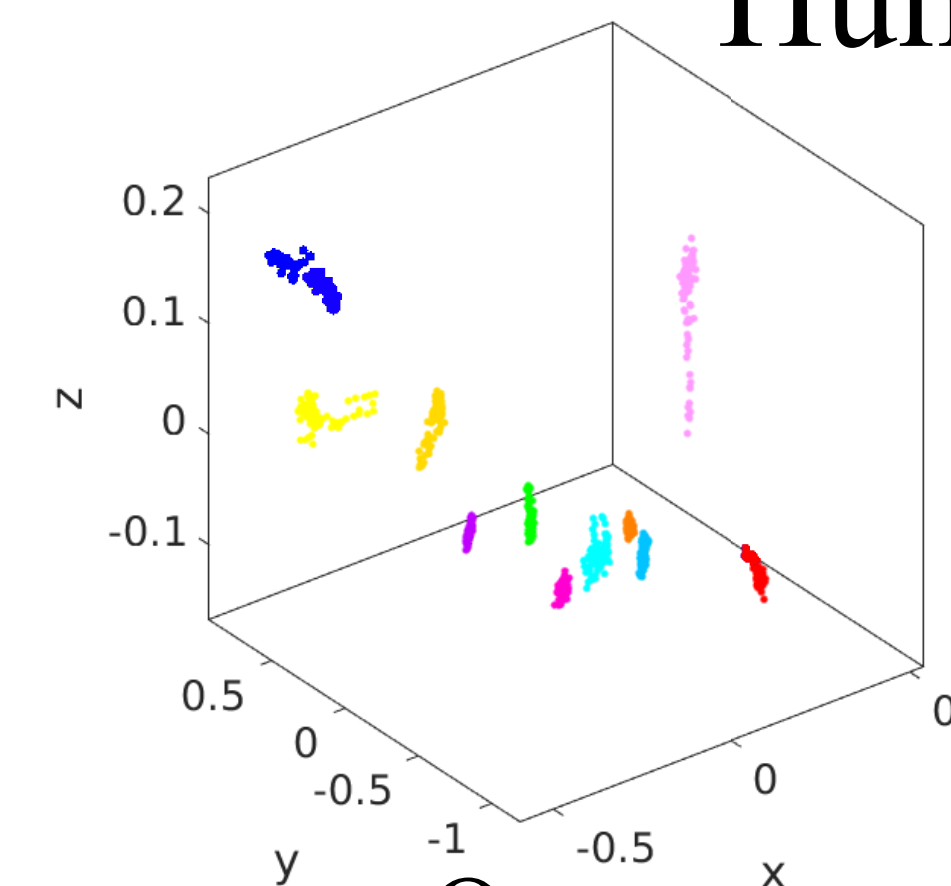

Ours

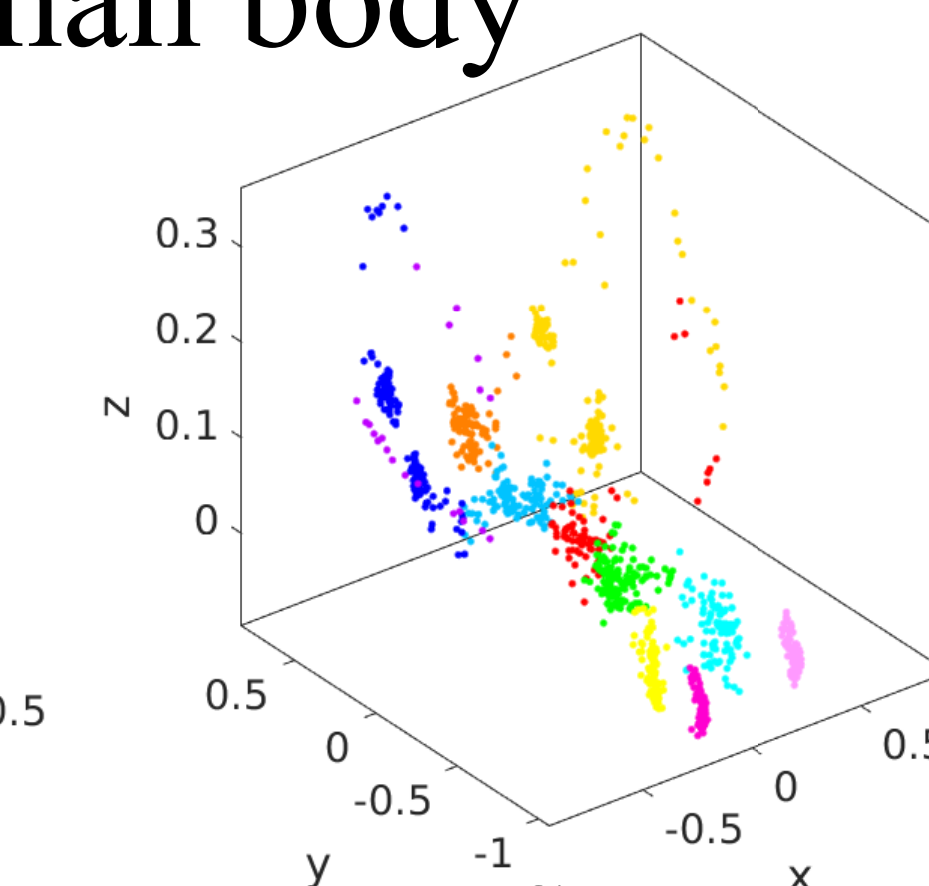

USIP

Faces

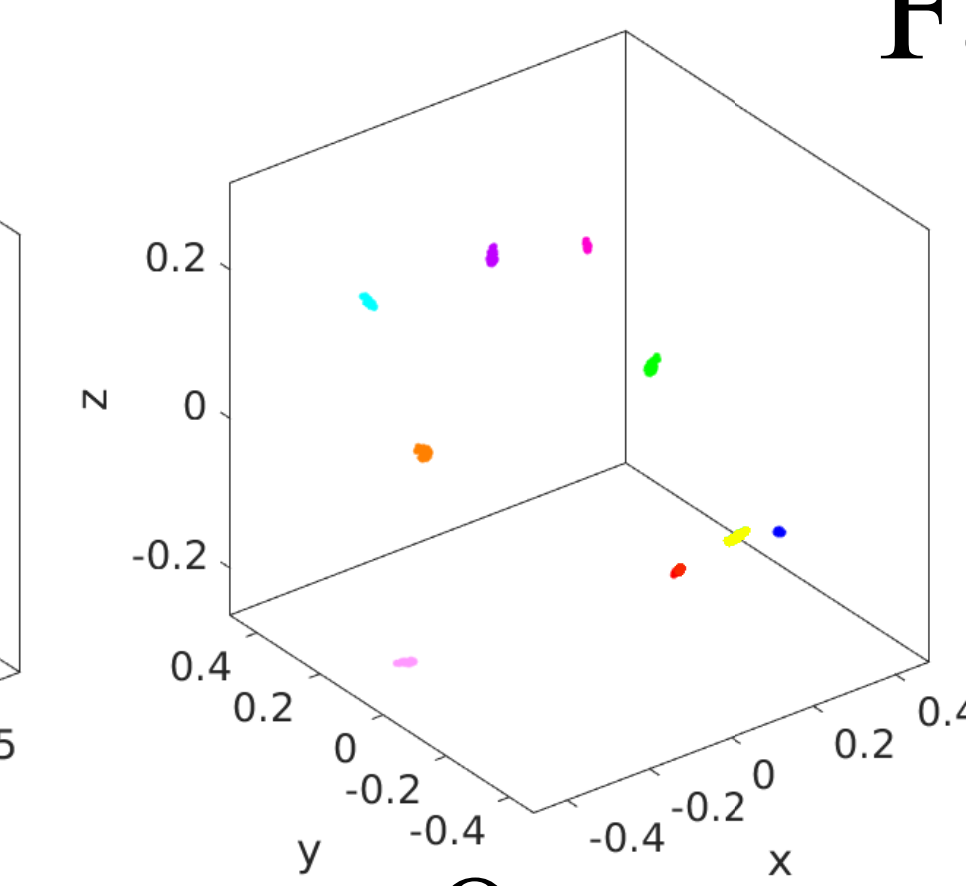

Ours

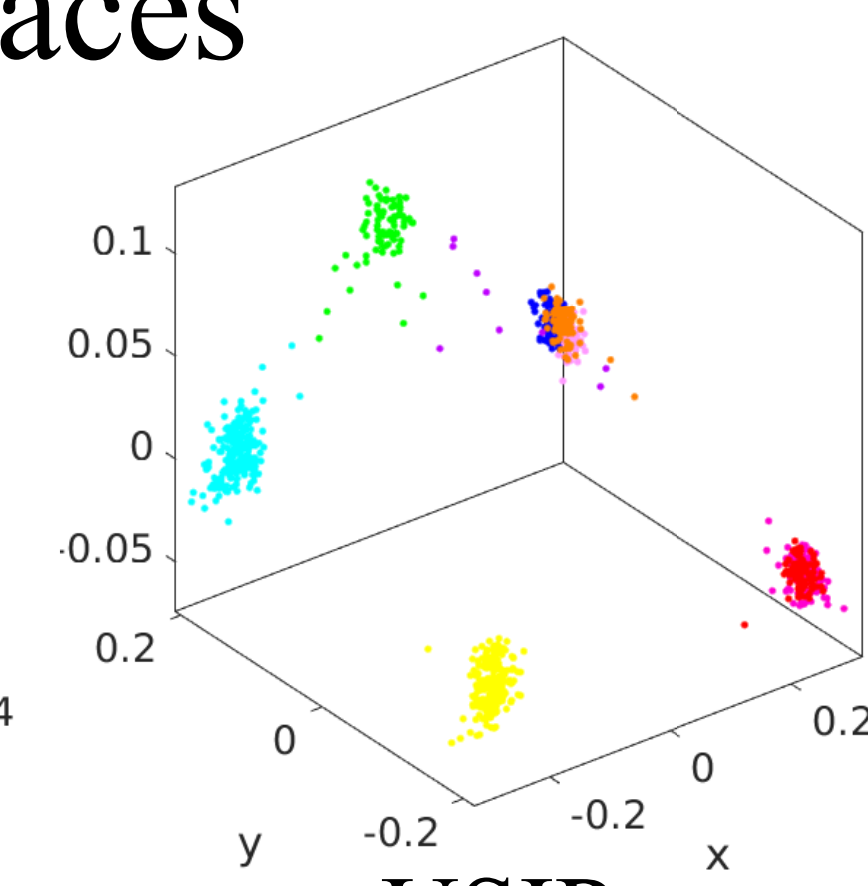

USIP
